# Supplementary material for: BAP1 deficiency causes loss of melanocytic cell identity in uveal melanoma
Source: PubMed Central journal article supplement (PMC3846494; doi:10.1186/1471-2407-13-371), 2013-08-05
Supplement: 1471-2407-13-371-S6.pdf [file 1471-2407-13-371-S6.pdf]

**Additional File 6. Enriched genes associated with each gene set category<sup>1</sup>**

| <b>Cell Cycle/<br/>Proliferation</b> | <b>Development/<br/>Stem Cell</b> | <b>RNA Metabolism/<br/>Splicing</b> | <b>DNA Damage/<br/>Telomere Maintenance</b> | <b>Metastasis</b> | <b>Epigenetic<br/>Regulation</b> | <b>Amino Acid<br/>Metabolism</b> | <b>BRCA1/2<br/>Pathway</b> | <b>Mitochondria</b> |
|--------------------------------------|-----------------------------------|-------------------------------------|---------------------------------------------|-------------------|----------------------------------|----------------------------------|----------------------------|---------------------|
| ANAPC11                              | ABHD11                            | CCAR1                               | ATR                                         | AK3L1             | ATP6V0E1                         | ACAT1                            | ASF1A                      | ABCB6               |
| ANLN                                 | ACTR1A                            | CD2BP2                              | BRCA1                                       | ANLN              | CAPZA2                           | ADC                              | BAT1                       | AK2                 |
| ASPM                                 | ADD3                              | CSTF1                               | CHAF1A                                      | CCT5              | CHMP5                            | AGMAT                            | CDKN2C                     | ATP5E               |
| BIRC5                                | ARL6IP6                           | CSTF3                               | CHEK2                                       | CKS1B             | CSE1L                            | ALDH1B1                          | CHEK2                      | ATP5I               |
| BRCA1                                | ASPM                              | CTDP1                               | DNA2                                        | DAD1              | SERINC3                          | ALDH2                            | DNA2                       | ATP5J               |
| BUB1                                 | ATP11C                            | ERCC2                               | ERCC1                                       | GRB2              |                                  | ALDH6A1                          | DNMT1                      | ATP5J2              |
| CASP8AP2                             | ATP1B1                            | GTF2H1                              | ERCC2                                       | H2AFV             |                                  | ARG2                             | EXOSC8                     | ATP5L               |
| CCDC99                               | ATP2C1                            | HNRNPA0                             | ERCC5                                       | HTRA2             |                                  | ASNS                             | EZH2                       | GPX4                |
| CCNB1                                | BAT1                              | HNRNPA1                             | ERCC6                                       | KIF11             |                                  | AUH                              | HMMR                       | HMGCS2              |
| CCNF                                 | BCLAF1                            | HNRNPA2B1                           | EXO1                                        | MRPS22            |                                  | BCAT1                            | ILF3                       | MRPL13              |
| CD36                                 | BIRC5                             | HNRNPR                              | FEN1                                        |                   |                                  | BCAT2                            | KIFC1                      | MRPS15              |
| CD25A                                | BRX1                              | HNRNPU                              | GTF2H1                                      |                   |                                  | LBR                              | CKMT1A                     | MRPS18C             |
| CDCA3                                | BUB1                              | HNRNPUL1                            | GTF2H5                                      |                   |                                  | CKMT1B                           | MCM5                       | MRPS33              |
| CDKN3                                | C14ORF106                         | LSM2                                | H2AFX                                       |                   |                                  | GATM                             | MTF2                       | NDUFA3              |
| CDT1                                 | C14ORF115                         | NCBP2                               | HIST1H2AC                                   |                   |                                  | GLUD1                            | PRPF4                      | NDUFA8              |
| CENPF                                | C19ORF42                          | NFX1                                | HIST1H2AE                                   |                   |                                  | GOT1                             | RAD51C                     | NDUFB1              |
| CKAP2                                | CACHD1                            | NHP2L1                              | HIST1H2BD                                   |                   |                                  | GOT2                             | RAD54L                     | NDUFB3              |
| CKS1B                                | CASP9                             | PABPN1                              | HIST1H2BG                                   |                   |                                  | HIBADH                           | RBBP4                      | NDUFB6              |
| CKS2                                 | CCNB1                             | PAPOLA                              | HIST1H2BJ                                   |                   |                                  | IVD                              | RFC4                       | NDUFC1              |
| CNIH4                                | CD25A                             | PCBP2                               | HIST1H2BK                                   |                   |                                  | MCCC2                            | RPA1                       | NDUFS5              |
| CPA3                                 | CD42EP3                           | PHF5A                               | HIST1H2BO                                   |                   |                                  | OAT                              | RPIA                       | NDUFS8              |
| CSE1L                                | CDCA3                             | POLR2A                              | HIST1H4E                                    |                   |                                  | ODC1                             | RQCD1                      | NDUFB2              |
| CUL1                                 | CDKN3                             | POLR2F                              | HIST1H4F                                    |                   |                                  | SAT1                             | RRM1                       | NFS1                |
| DNA2                                 | CDT1                              | POLR2H                              | HIST1H4H                                    |                   |                                  | SRM                              | SKP2                       | PCCB                |
| E2F3                                 | CETN3                             | POLR2I                              | HIST1H4J                                    |                   |                                  |                                  | SNRPA1                     | TIMM23              |
| ECT2                                 | CHEK2                             | POLR2L                              | HIST1H4K                                    |                   |                                  |                                  | SNRPB                      | TSPO                |
| ERCC6L                               | CKS1B                             | PRPF4                               | HIST2H2AA3                                  |                   |                                  |                                  | TFDP1                      | VDAC3               |
| EXO1                                 | CKS2                              | SF3A2                               | HIST2H2AC                                   |                   |                                  |                                  | TMPO                       |                     |
| EZH2                                 | CSE1L                             | SF3B14                              | HIST2H2BE                                   |                   |                                  |                                  | TOPBP1                     |                     |
| FABP5                                | CSTF3                             | SF3B5                               | MSH6                                        |                   |                                  |                                  | UBE2C                      |                     |
| FBXO5                                | CYP26A1                           | SFRS3                               | POLA1                                       |                   |                                  |                                  | UNG                        |                     |
| FEN1                                 | DEPDC1                            | SFRS7                               | POLA2                                       |                   |                                  |                                  | USP1                       |                     |
| FZR1                                 | ECT2                              | SNRNP70                             | POLE4                                       |                   |                                  |                                  | XPO1                       |                     |
| GINS3                                | ERBB2                             | SNRPA1                              | POT1                                        |                   |                                  |                                  |                            |                     |
| GPSM2                                | EXOSC5                            | SNRPB                               | RAD51C                                      |                   |                                  |                                  |                            |                     |
| GTSE1                                | FABP5                             | SNRPB2                              | RAD54L                                      |                   |                                  |                                  |                            |                     |
| H2AFV                                | FAM64A                            | SNRPD1                              | RBBP4                                       |                   |                                  |                                  |                            |                     |
| H2AFX                                | FBL                               | SNRPF                               | RFC4                                        |                   |                                  |                                  |                            |                     |
| HELLS                                | FBXL14                            | SNRPG                               | RPA1                                        |                   |                                  |                                  |                            |                     |
| HMMR                                 | FEN1                              | TCEB1                               | RPA2                                        |                   |                                  |                                  |                            |                     |
| HN1                                  | FKBP5                             | TCEB2                               | RPA3                                        |                   |                                  |                                  |                            |                     |
| HSPA14                               | FLNA                              | TCEB3                               | RRM1                                        |                   |                                  |                                  |                            |                     |
| KIAA0101                             | FXR1                              | THOC4                               | RUVBL1                                      |                   |                                  |                                  |                            |                     |
| KIF11                                | FZD7                              | U2AF1                               | SHFM1                                       |                   |                                  |                                  |                            |                     |
| KIF14                                | GAL                               | U2AF2                               | SUMO1                                       |                   |                                  |                                  |                            |                     |
| KIFC1                                | GDF3                              |                                     | TERF1                                       |                   |                                  |                                  |                            |                     |
| LBR                                  | GEMIN6                            |                                     | TERT                                        |                   |                                  |                                  |                            |                     |
| LEPR                                 | GMPR2                             |                                     | TINF2                                       |                   |                                  |                                  |                            |                     |
| LRP8                                 | H2AFV                             |                                     | TOPBP1                                      |                   |                                  |                                  |                            |                     |
| MCM5                                 | HELLS                             |                                     | UBE2I                                       |                   |                                  |                                  |                            |                     |
| MCM7                                 | HMGA1                             |                                     | UNG                                         |                   |                                  |                                  |                            |                     |
| MDM2                                 | HMMR                              |                                     | XPA                                         |                   |                                  |                                  |                            |                     |
| MELK                                 | IGF2BP3                           |                                     |                                             |                   |                                  |                                  |                            |                     |
| MINPP1                               | ILF3                              |                                     |                                             |                   |                                  |                                  |                            |                     |
| MLF1IP                               | INF2                              |                                     |                                             |                   |                                  |                                  |                            |                     |
| MRPS15                               | JARID2                            |                                     |                                             |                   |                                  |                                  |                            |                     |
| NANOG                                | KCTD2                             |                                     |                                             |                   |                                  |                                  |                            |                     |
| NCAPG                                | KIAA0101                          |                                     |                                             |                   |                                  |                                  |                            |                     |
| NUF2                                 | KIF14                             |                                     |                                             |                   |                                  |                                  |                            |                     |
| NUP85                                | KNTC1                             |                                     |                                             |                   |                                  |                                  |                            |                     |
| NUSAP1                               | KRT8                              |                                     |                                             |                   |                                  |                                  |                            |                     |
| OIP5                                 | LARP1                             |                                     |                                             |                   |                                  |                                  |                            |                     |
| ORC1L                                | LBR                               |                                     |                                             |                   |                                  |                                  |                            |                     |
| ORC4L                                | LDHA                              |                                     |                                             |                   |                                  |                                  |                            |                     |
| ORC5L                                | LRP8                              |                                     |                                             |                   |                                  |                                  |                            |                     |
| PARP1                                | LRRN1                             |                                     |                                             |                   |                                  |                                  |                            |                     |
| PDSS1                                | LXN                               |                                     |                                             |                   |                                  |                                  |                            |                     |
| PKMYT1                               | MAP7                              |                                     |                                             |                   |                                  |                                  |                            |                     |
| POLA1                                | MBNL1                             |                                     |                                             |                   |                                  |                                  |                            |                     |
| POLA2                                | MELK                              |                                     |                                             |                   |                                  |                                  |                            |                     |
| POLQ                                 | MGST1                             |                                     |                                             |                   |                                  |                                  |                            |                     |
| PRC1                                 | MKRN1                             |                                     |                                             |                   |                                  |                                  |                            |                     |
| PRG2                                 | MSH6                              |                                     |                                             |                   |                                  |                                  |                            |                     |
| PSMA1                                | NANOG                             |                                     |                                             |                   |                                  |                                  |                            |                     |
| PSMA3                                | NEBL                              |                                     |                                             |                   |                                  |                                  |                            |                     |
| PSMA4                                | NIF3L1                            |                                     |                                             |                   |                                  |                                  |                            |                     |
| PSMA6                                | NOP16                             |                                     |                                             |                   |                                  |                                  |                            |                     |
| PSMB1                                | NUDT15                            |                                     |                                             |                   |                                  |                                  |                            |                     |
| PSMB10                               | NUF2                              |                                     |                                             |                   |                                  |                                  |                            |                     |
| PSMB3                                | NUSAP1                            |                                     |                                             |                   |                                  |                                  |                            |                     |
| PSMB6                                | OIP5                              |                                     |                                             |                   |                                  |                                  |                            |                     |
| PSMB7                                | ORC1L                             |                                     |                                             |                   |                                  |                                  |                            |                     |
| PSMC1                                | OVOL2                             |                                     |                                             |                   |                                  |                                  |                            |                     |
| PSMC2                                | PAPOLA                            |                                     |                                             |                   |                                  |                                  |                            |                     |
| PSMC3                                | PGK1                              |                                     |                                             |                   |                                  |                                  |                            |                     |

| <b>Cell Cycle/<br/>Proliferation</b> | <b>Development/<br/>Stem Cell</b> |
|--------------------------------------|-----------------------------------|
| PSMD11                               | PHGDH                             |
| PSMD12                               | PIH1D1                            |
| PSMD3                                | PITX2                             |
| PSMD6                                | PLAT                              |
| PSME2                                | POLA1                             |
| RAD51                                | PPAP2A                            |
| RAD54L                               | PRC1                              |
| RANBP1                               | PRDX3                             |
| RANGAP1                              | PREB                              |
| RFC4                                 | PRKX                              |
| RPA1                                 | PUS7                              |
| RPA2                                 | RFC4                              |
| RPA3                                 | RHOQ                              |
| RRM1                                 | RNF138                            |
| SAC3D1                               | RPA3                              |
| SHCBP1                               | RPL13                             |
| SKP2                                 | SCGB3A2                           |
| SMC2                                 | SEC22C                            |
| SNRPD1                               | SERBP1                            |
| SPC25                                | SERPINE1                          |
| STAG1                                | SFRS7                             |
| STIL                                 | SIN3B                             |
| SYNCRIP                              | SKP2                              |
| TFDP1                                | SLC25A11                          |
| TK1                                  | SLC44A1                           |
| TMPO                                 | SMARCA4                           |
| TMSB10                               | SMS                               |
| TOPBP1                               | SNRPB                             |
| UBB                                  | SNRPF                             |
| UBE2C                                | SNRPN                             |
| WEE1                                 | SPC24                             |
| XPO1                                 | SPC25                             |
| ZNF593                               | SPG7                              |
|                                      | SPRY4                             |
|                                      | STIL                              |
|                                      | SYPL1                             |
|                                      | TARBP2                            |
|                                      | TDGF1                             |
|                                      | TEAD4                             |
|                                      | TERF1                             |
|                                      | TFB2M                             |
|                                      | TK1                               |
|                                      | TMPO                              |
|                                      | TLL12                             |
|                                      | TUBG1                             |
|                                      | UBE2C                             |
|                                      | UNG                               |
|                                      | USP44                             |
|                                      | WDHD1                             |
|                                      | WEE1                              |
|                                      | YWHAH                             |
|                                      | ZNF395                            |

<sup>1</sup>Genes are listed only if they are enriched in at least two gene sets within a given category
